# Supplementary material for: Ultra-fast and robust capture of fluoride by an amino terephthalic acid-facilitated lanthanum-based organic framework: insight into performance and mechanisms
Source: Royal Society of Chemistry journal article supplement (doi:10.1039/d2nj05576g), 2022-12-13
Supplement: d2nj05576g1.pdf [file d2nj05576g1.pdf]

## 1 Electronic supplementary information

### 2 **Ultra-fast and Robust Capture of Fluoride by Amino Terephthalic Acid Facilitated** 3 **Lanthanum Based Organic Framework: Insight into Performance and Mechanisms**

4

#### 5 **Supporting Information**

#### 6 **Batch experimental studies using La@ATPA and La@TPA**

7 The effect of initial pH on the uptake of fluoride by La@ATPA and La@TPA was studied over  
8 pH 2-11. The initial concentration of fluoride was maintained at 5 mg/L with a sorbent dosage  
9 of 1 g/L in a final volume of 20 mL. The suspensions were equilibrated for 2 h in an orbital  
10 shaker at 110 rpm at 25°C. After equilibration, samples were filtered using 125 mm Whatmann  
11 filter paper (11-micron pore size) and analysed for fluoride.

12 Sorption isotherm studies on La@ATPA and La@TPA were accomplished with batch  
13 reactors containing varying initial concentrations of fluoride (5 mg/L to 1000 mg/L) with a  
14 fixed sorbent dosage (1.0 g/L) in a total reactor volume of 20 mL at circumneutral pH. Reactors  
15 were equilibrated for 2 h and analysed as before. The amount of F uptake by La@ATPA and  
16 La@TPA and percentage F removal were evaluated using the following equations,  
17 respectively:

$$18 \quad q_e = \frac{(C_0 - C_e)}{m} \times V \quad (1)$$

$$19 \quad \text{Removal percentage of fluoride (\%)} = \frac{(C_0 - C_e)}{C_0} \times 100 \quad (2)$$

20 where,  $q_e$  is the amount of fluoride sorbed (mg/g),  $C_0$  and  $C_e$  are the initial and equilibrium  
21 concentrations of fluoride (mg/L),  $m$  is the mass of sorbent (g),  $V$  is the total volume of the  
22 reactor. Microsoft Excel 2019 has been used for the calculation of error bars. The expression  
23 of the error functions is as follows <sup>1,2</sup> :

$$24 \quad \text{Average relative error (ARE)} = \frac{1}{N} \sum \frac{|Q_{cal} - Q_{exp}|}{Q_{exp}} \times 100 \quad (3)$$

25                      Chi-square ( $X^2$ ) =  $\sum \frac{(Q_{exp} - Q_{cal})^2}{Q_{cal}}$                       (4)

26 where N represents the experimental data points,  $Q_{cal}(mg/g)$  and  $Q_{exp}(mg/g)$  is the calculated  
27 and experimental adsorption capacity of La@ATPA and La@TPA at equilibrium.

28                      Kinetics of F sorption on both sorbents was quantified using a 10 mg/L fluoride solution  
29 and an adsorbent dose of 1.0 g/L. The uptake of fluoride by various MOFs were monitored at  
30 predefined time intervals. Potential interference of other anions and organic matter, like  
31 chloride, nitrate, sulfate, bicarbonate, phosphate, arsenate and humic acid on F removal was  
32 investigated by adding varying concentrations of interfering ions to 10 mg/L of F added to  
33 ultrapure water. The concentrations of these ions tested were in accordance with their levels  
34 typically present in groundwater. The solutions containing fluoride and interfering ions were  
35 equilibrated with 1 g/L of La@ATPA for 2 h, filtered and analysed for fluoride.

36                      To study the recyclability of the sorbent, F desorption studies were carried out after  
37 fluoride was loaded on La@ATPA. Fluoride-loaded La@ATPA was contacted with 20 mL of  
38 varying concentrations of alkali (0.01, 0.1, 0.5, 1.0 M). The suspensions were equilibrated for  
39 2 h in an orbital shaker maintained at 110 rpm. After equilibration, suspensions were filtered  
40 and analysed for F. The desorbed sorbent was washed with water to remove the alkalinity and  
41 the cycles were repeated.

42                      Leaching studies were conducted on fluoride-loaded La@ATPA. Initially, 0.05 g of  
43 La@ATPA was equilibrated with a solution containing 10 mg/L of F. After sorption, the  
44 suspensions were filtered and F-loaded sorbent were equilibrated with different pH (3.0, 3.6,  
45 4.1, 5.35 and 6.3) for 24 h, after which samples were drawn, filtered, and analyzed for fluoride.  
46 To further assess the long-term leachability of fluoride, around 0.05 g of F-loaded La@ATPA  
47 was equilibrated in both 100 mL each of DI water and groundwater for a period of one week.  
48 The application of La@ATPA on real fluoride-contaminated groundwater samples was also  
49 evaluated. The samples were collected from three locations of Bansathi village, Kanpur Nagar

50 and Uttar Pradesh. Most of the groundwater sources in that village were contaminated by  
51 fluoride (Supporting Information Table S1).<sup>3</sup> The three locations were chosen based on  
52 different levels of fluoride concentrations (2.0, 4.8, 6.0 mg/L) in the handpumps. Samples were  
53 collected in 1 L Tarson HDPE wide-mouthed bottles. The bottles were cleaned thoroughly with  
54 ultrapure water prior to sampling. Before sample collection, ~20 L of stagnant water were  
55 discarded from each handpump. The bottles were capped tightly and wrapped with Parafilm to  
56 ensure that no atmospheric exchange occurs during transportation to the laboratory.  
57 Additionally, two samples of IIT Kanpur groundwater with an inherent F concentration of  
58 0.982 mg/L, spiked with 4 mg/L and 8 mg/L of fluoride, were also tested. For each experiment,  
59 20 mL of the samples were equilibrated with La@ATPA at a dosage of 2.5 g/L for 2 h. The  
60 equilibrated suspensions were filtered and the supernatants were analyzed for fluoride. All  
61 batch experiments described above were conducted in triplicate and the average of the three  
62 readings were recorded.

### 63 **Characterization studies and analysis of aqueous and solid samples**

64 Fluoride was determined by a Thermo Orion meter using a fluoride ion-selective electrode.  
65 The meter was first calibrated with standard solutions of 0.5, 5 and 10 mg/L of fluoride. For  
66 each analysis, the total ionic strength adjustment buffer (TISAB) was mixed with standards  
67 and samples in a ratio of 1:1 to prevent the formation of metal-fluoride complexes. A pH meter  
68 (pH510 Eutech) was used to analyse the pH of the solution. Analysis of phosphate ( $\text{PO}_4^{3-}$ ),  
69 sulphate ( $\text{SO}_4^{2-}$ ), nitrate ( $\text{NO}_3^-$ ) and chloride ( $\text{Cl}^-$ ) were carried out using Metrohm 882 compact  
70 ion chromatography (IC). 1 mM sodium bicarbonate in 3.2 mM sodium carbonate buffer was  
71 used as eluent using Metrosep A Supp 5 column. The flow rate of the eluent was maintained at  
72 0.7 mL/min. The lower limit of detection was found to be 0.1 mg/L for IC. Inductively coupled  
73 plasma-mass spectrometry (ICP-MS; Thermo Scientific X-SERIES 2) was used to analyse  
74 arsenic (As), cadmium (Cd), chromium (Cr), and copper (Cu). The lower limit of detection for

75 the method was 2 ng/L. Total dissolved solids were measured by a TDS meter (HACH,  
76 HQ30d). Alkalinity was determined by titration using 0.02 N standard sulphuric acid as titrant  
77 and methyl orange solution as indicator. Hardness was analyzed by titrimetry using  
78 ethylenediaminetetraacetic acid as a reagent and Eriochrome Black T as an indicator.  
79 Point of zero charge values of La@TPA and La@ATPA were measured using Brookhaven  
80 ZetaPALS connected to BI-ZTU auto-titrator. Samples were prepared by dispersing 0.6 g of  
81 material in 80 mL of 0.01 M KNO<sub>3</sub>.<sup>4</sup> The suspensions were stirred using a magnetic stirrer at  
82 110 rpm for 24 h to achieve equilibration. Prior to measurements, the solutions were sonicated  
83 for 10 min and kept undisturbed for 1 h for settling after which supernatants were collected for  
84 analysis.

85         The morphology of synthesised MOF La@ATPA was analyzed using field emission  
86 scanning electron microscopy (FE-SEM; FEI Quanta 200) at macroscopic scale and by  
87 transmission electronic microscopy (TEM; Technai G2 T-20 FEI) at a higher resolution. For  
88 TEM analysis samples were ultrasonicated with ethanol for 15 min at room temperature. Then,  
89 ethanol dispersed sample droplets were placed on the copper grid (3mm diameter) and vacuum  
90 dried. The infrared spectrum of MOF was analysed in attenuated total reflectance (ATR) mode  
91 by Fourier-transform infrared spectrometry (FTIR; Bruker) with KBR pellets. The prevalent  
92 phases in the sorbents were studied using an X-ray diffractometer (XRD; Hecus S3 micro). The  
93 sample angle ( $2\theta$ ), from 5 to 80 °C was measured at 45 kV and 40 mA. The oxidation states  
94 and chemical composition of La@ATPA were analysed using X-ray photoelectron  
95 spectroscopy (XPS; PHI 5000 Versa Probe II) with a monochromatic Mg K $\alpha$ . Deconvolution  
96 of individual molecular orbital peaks of various elements was carried out using XPSPEAK41  
97 software.<sup>5</sup> The BET surface area and pore volume were analysed by the Autosorb 1-C  
98 instrument (AS1-C, Quantachrome). The N<sub>2</sub> adsorption desorption curve has been plotted as  
99 reported by Zhang et al.<sup>4,5</sup>

## 100 Geochemical analysis

101 Dissolved solute data were analyzed for chemical equilibrium speciation with well-known  
102 modelling software, Visual MINTEQ 3.1.<sup>6</sup> All ionic strength corrections were performed using  
103 the Davies equation. Solubility (log C-pH) plots were prepared by considering the infinite mass  
104 of the relevant solid, LaF<sub>3</sub>(s). The default database of Visual MINTEQ 3.1 was used for all the  
105 thermodynamic analyses. All calculations were performed considering the system as closed to  
106 the atmosphere.

107

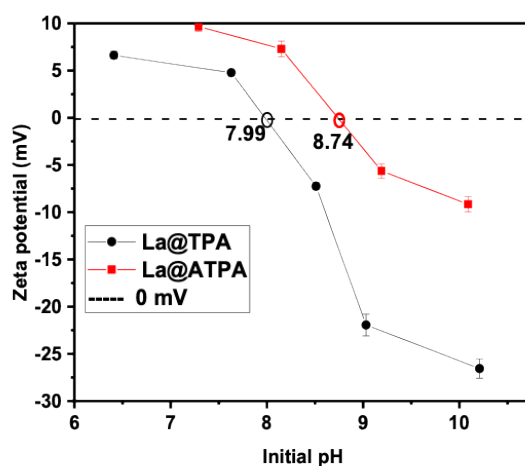

108

109 **Figure S1. Zeta potential of the two sorbents (La@TPA and La@ATPA) was used for the**  
110 **F sorption study.**

111

112

113

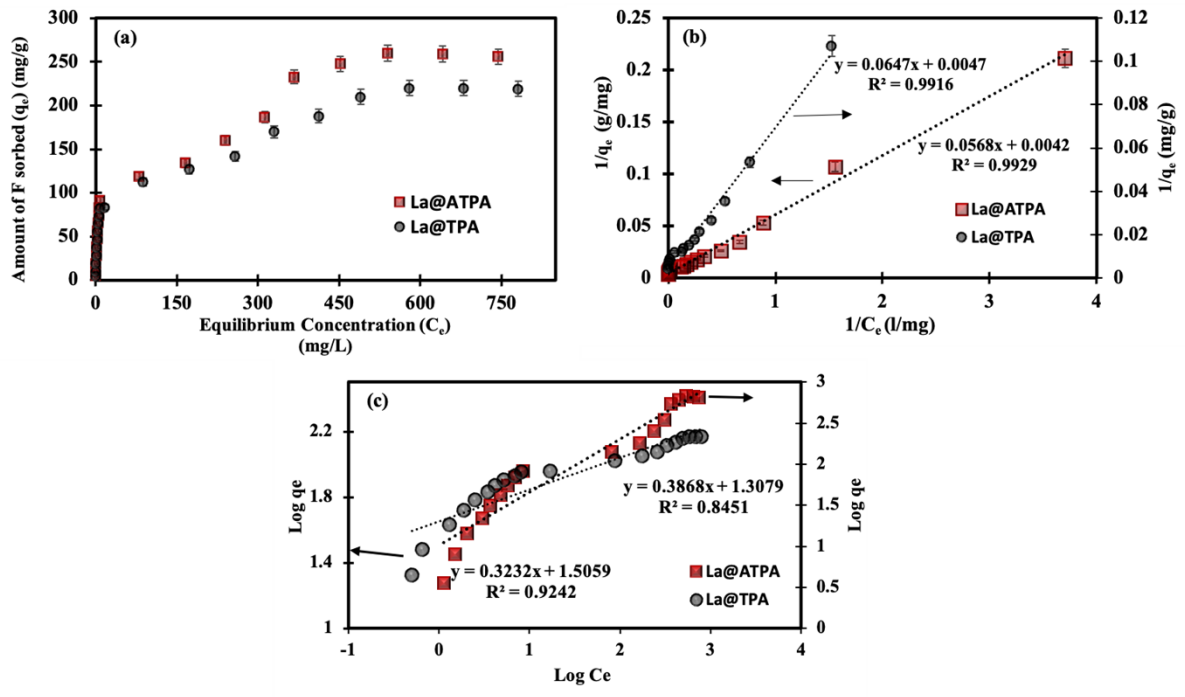

114  
 115  
 116  
 117  
 118  
 119

**Figure S2. Fluoride uptake on La@TPA and La@ATPA sorbents: (a) Equilibrium sorption isotherm, (b) Linearized Langmuir plot and (c) Linearized Freundlich plot.**

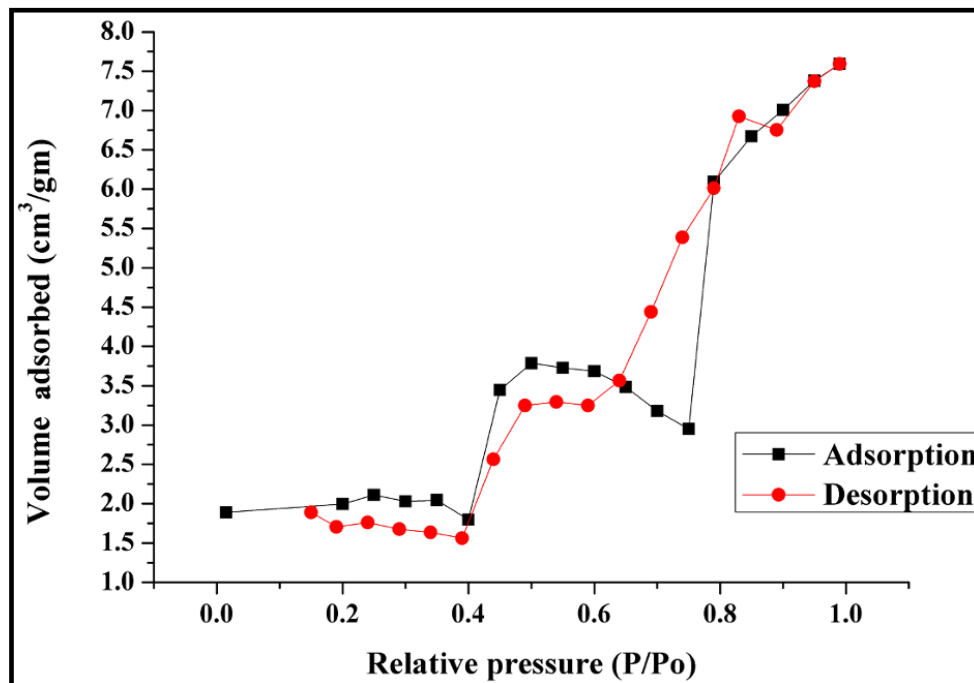

120  
 121  
 122  
 123

**Figure S3. N<sub>2</sub> adsorption-desorption curves of La@ATPA**

124

125

126

**Table S1. Details of real contaminated groundwater sampling locations.**

| <b>Sample ID</b> | <b>Latitude (N)</b> | <b>Longitude (E)</b> | <b>Depth (m)</b> |
|------------------|---------------------|----------------------|------------------|
| S1               | 26° 34' 28.4412"    | 80° 9' 13.3704"      | 12               |
| S2               | 26° 34' 29.1036"    | 80° 9' 11.754"       | 11               |
| S3               | 26° 34' 31.8828"    | 80° 9' 11.9376"      | 12               |

127

128

129

130

131

132

133

**Table S2. Specific surface area and pore volumes of La@ATPA**

| <b>Parameter</b>                          | <b>Values</b> |
|-------------------------------------------|---------------|
| Specific Surface Area (m <sup>2</sup> /g) | 18.14         |
| Average Pore Diameter (nm)                | 5.91          |
| Total Pore Volume (cc/g)                  | 0.0268        |
| Micropores (%)                            | 2.0           |
| Mesopores (%)                             | 84.2          |
| Macropores (%)                            | 13.8          |

139

140 **Table S3. Comparison of adsorption capacities of various MOFs towards defluoridation**

| S.No | MOF                                          | pH                        | Langmuir Adsorption Capacity (mg/g)   | Equilibrium Time (mins/hrs.)   | Ref.                |
|------|----------------------------------------------|---------------------------|---------------------------------------|--------------------------------|---------------------|
| 1    | Sn (II)-TMA MOF                              | 3-10                      | 30.86                                 | 150 mins                       | 7                   |
| 2    | MOF-801                                      | -                         | 19.42                                 | 120 mins                       | 8                   |
| 3    | Ce-BDC-48                                    | -                         | 128.0                                 | 85 mins                        | 9                   |
| 4    | MIL-96(Al)                                   | 3                         | 42.9                                  | 90 mins                        | 10                  |
| 5    | UiO-66-amine                                 | 7                         | 41.5                                  | -                              | 11                  |
| 6    | MIL-96                                       | 7                         | 21.2                                  | -                              | 12                  |
| 7    | Aluminum Fumarate                            | 7                         | 600.0                                 | 24 hrs                         | 13                  |
| 8    | Al. Fumarate and PAN                         | 7                         | 205.0                                 | 6 hrs                          | 14                  |
| 9    | Ce-MIL-96                                    | 3-10                      | 38.65                                 | -                              | 15                  |
| 10   | Al Fumarate + Cellulose acetate              | 7                         | 179.0                                 | -                              | 16                  |
| 11   | Zr-MOF                                       | -                         | 102.4                                 | 20 mins                        | 17                  |
| 12   | Ce-BPDC                                      | 6                         | 45.5                                  | 20 mins                        | 18                  |
| 13   | La@ABDC                                      | 3-9                       | 4.95                                  | 30 mins                        | 19                  |
| 14   | UiO-66-NH2 CNM                               | 4-10                      | 95                                    | 60 mins                        | 20                  |
| 15   | Ce@ABDC and Ce@BDC                           | 6-7                       | 4.91 and 4.88                         | 30 mins                        | 21                  |
| 16   | La-BTC, La-BPDC, La-BHTA, La-PMA, and La-BDC | 4-9                       | 105.2, 125.9, 145.5, 158.9, and 171.7 | 180 mins                       | 22                  |
| 17   | NH <sub>2</sub> -MIL-53(Al)                  | 7                         | 202.5                                 | -                              | 23                  |
| 18   | R-MIL-100(Fe)                                | 6.5                       | 23.53                                 | 1.5 hrs                        | 24                  |
| 19   | La-BTC                                       | 3                         | 155.92                                | -                              | 25                  |
| 20   | <b>La@TPA</b><br><b>La@ATPA</b>              | <b>4-8</b><br><b>3-10</b> | <b>212.7</b><br><b>232.5</b>          | <b>3 hrs</b><br><b>90 mins</b> | <b>Present Work</b> |

141  
142  
143  
144  
145  
146  
147  
148



**Table S4. XPS Analysis of La@ATPA before and after fluoride loading**

| Sample    | Element  | Binding Energy (eV)              |                                                                                   | Inference                                                                                               |
|-----------|----------|----------------------------------|-----------------------------------------------------------------------------------|---------------------------------------------------------------------------------------------------------|
| La@ATPA   | La 3d5/2 | 833.6<br>836.3                   |  | La-O bond                                                                                               |
| F-La@ATPA | La 3d5/2 | 833.7<br>835.9<br>832.0<br>834.6 |  | La-O bond<br>La-F bond                                                                                  |
| F-La@ATPA | F1s      | 681.9<br>682.5<br>683.2<br>684.7 |                                                                                   | OH <sub>3</sub> <sup>+</sup> ---F<br>-NH <sub>3</sub> <sup>+</sup> ---F<br>physisorbed fluoride<br>La-F |
| La@ATPA   | N1s      | 397.4<br>403.7                   |                                                                                   | Amino group<br>Nitro group                                                                              |
| F-La@ATPA | N1s      | 397.2<br>403.5<br>398.1          |                                                                                   | Amino group<br>Nitro group<br>-NH <sub>3</sub> <sup>+</sup> ---F                                        |

150  
151  
152  
153  
154  
155  
156  
157  
158  
159  
160  
161  
162  
163  
164  
165  
166  
167  
168  
169  
170  
171  
172  
173  
174  
175  
176  
177  
178

179

180 **References**

181

- 182 1. B.A. Ezeonuegbu, D.A Machido, C.M. Whong, W.S. Japhet ,A. Alexiou , S.T.Elazab  
183 ,N. Qusty, C.A. Yaro, G.E. Batiha, Agricultural waste of sugarcane bagasse as an  
184 efficient adsorbent for lead and nickel removal from untreated wastewater: Biosorption,  
185 equilibrium isotherms, kinetics and desorption studies. *Biotechnol. Rep.*,2021, 30,  
186 e00614.
- 187 2. D. Gomez, C. Rodrigues, F.R. Lapolli, and M.A. Lobo-Recio, Adsorption of heavy  
188 metals from coal acid mine drainage by shrimp shell waste: Isotherm and continuous-  
189 flow studies. *J. Environ. Chem. Eng.*, 2019, 7(1), 102787.
- 190 3. A. K. Mohapatra, S. Sujathan, A. S. Ekamparam and A. Singh, The role of  
191 manganese carbonate precipitation in controlling fluoride and uranium mobilization in  
192 groundwater, *ACS Earth Space Chem.*, 2021, 5(10), 2700-2714.
- 193 4. O. S. Pokrovsky and J. Schott, Surface chemistry and dissolution kinetics of divalent  
194 metal carbonates, *Environ. Sci. Technol.*, 2002, 36(3), 426-432.
- 195 5. R. Kwok, 2000, XPS Peak Fitting Program for WIN95/98 XPSPEAK Ver.  
196 4.1. <http://www.phy.cuhk.edu.hk/~surface/XPSPEAK/>.
- 197 6. J.P. Gustafsson, 2017 Visual MINTEQ, V 3.1, Department of Land and Water  
198 Resources Engineering, KTH, Stockholm, Sweden.
- 199 7. A. Ghosh and G. Das, Green synthesis of a novel water-stable Sn (ii)-TMA metal–  
200 organic framework (MOF): an efficient adsorbent for fluoride in aqueous medium in a  
201 wide pH range, *New J. Chem.*, 2020, 44(4), 1354-1361.
- 202 8. T. L. Tan, H. Nakajima and S.A. Rashid, Adsorptive, kinetics and regeneration studies  
203 of fluoride removal from water using zirconium-based metal organic frameworks, *RSC*  
204 *Adv.*, 2020, 10(32), 18740-18752.

- 205 9. J. He, Y. Xu, Z. Xiong, B. Lai, Y. Sun, , Y. Yang and L. Yang, The enhanced removal  
206 of phosphate by structural defects and competitive fluoride adsorption on cerium-based  
207 adsorbent, *Chemosphere.*, 2020, **256**, 127056.
- 208 10. X. Wang, , H. Zhu, T. Sun, Y. Liu, T. Han, J. Lu and L. Zhai, Synthesis and Study  
209 of an Efficient Metal-Organic Framework Adsorbent (MIL-96 (Al)) for Fluoride  
210 Removal from Water, *J. Nanomater.*, 2019, **2019**.
- 211 11. M. Massoudinejad, M. Ghaderpoori, A. Shahsavani and M.M. Amini, Adsorption of  
212 fluoride over a metal organic framework Uio-66 functionalized with amine groups and  
213 optimization with response surface methodology, *J. Mol. Liq.*, 2016, **221**, 279-286.
- 214 12. N. Zhang, X. Yang, X. Yu, Y. Jia, J. Wang, L. Kong and J. Liu, Al-1, 3, 5-  
215 benzenetricarboxylic metal-organic frameworks: A promising adsorbent for  
216 defluoridation of water with pH insensitivity and low aluminum residual, *Chem. Eng.*  
217 *J.*, 2014, **252**, 220-229.
- 218 13. J. Dechnik, C. Janiak and S. De, Aluminium fumarate metal-organic framework: a  
219 super adsorbent for fluoride from water, *J. Hazard. Mater.*, 2016, **303**, 10-20.
- 220 14. S. Karmakar, S. Bhattacharjee and S. De, Aluminium fumarate metal organic  
221 framework incorporated polyacrylonitrile hollow fiber membranes: spinning,  
222 characterization and application in fluoride removal from groundwater, *Chem. Eng. J.*,  
223 2018,**334**, 41-53
- 224 15. X. Yang, S. Deng, F. Peng and T. Luo, A new adsorbent of a Ce ion-implanted metal-  
225 organic framework (MIL-96) with high-efficiency Ce utilization for removing fluoride  
226 from water, *Dalton Trans.*, 2017, **46**(6), 1996-2006.
- 227 16. S. Karmakar, S. Bhattacharjee and S. De, Experimental and modeling of fluoride  
228 removal using aluminum fumarate (AlFu) metal organic framework incorporated

- 229 cellulose acetate phthalate mixed matrix membrane, *Environ. Sci. Water Res. Technol.*,  
230 2017, **5**(6), 6087-6097.
- 231 17. J. He, X. Cai, K. Chen, Y. Li, K. Zhang, Z. Jin and J. Liu, Performance of a novel-  
232 defined zirconium metal-organic frameworks adsorption membrane in fluoride  
233 removal, *J. Colloid Interface Sci.*, 2016, **484**, 162-172.
- 234 18. C. Zhao, Y. Cui, F. Fang, S. O . Ryu and J. Huang, Synthesis of a novel Ce-bpdc for  
235 the effective removal of fluoride from aqueous solution, *Adv. Condens. Matter Phys.*,  
236 2017.
- 237 19. A. Jeyaseelan and N. Viswanathan, Design of amino-functionalized benzene-1, 4-  
238 dicarboxylic acid-fabricated lanthanum-based metal–organic frameworks for  
239 defluoridation of water. *J. Chem. Eng. Data* ., 2020, **65**(11), 5328-5340.
- 240 20. A. Mohamed, E. P. V. Sanchez, E. Bogdanova, B. Bergfeldt, A. Mahmood, , R. V.  
241 Ostvald, and T. Hashem, Efficient fluoride removal from aqueous solution using  
242 zirconium-based composite nanofiber membranes. *Membranes.*, 2021, **11**(2), 147.
- 243 21. A. Jeyaseelan, M. Naushad, T. Ahamad and N. Viswanathan, Fabrication of amino  
244 functionalized benzene-1, 4-dicarboxylic acid facilitated cerium based metal organic  
245 frameworks for efficient removal of fluoride from water environment, *Environ. Sci.*  
246 *Water Res. Technol.*, 2021, **7**(2), 384-395.
- 247 22. C. Yin, Q. Huang, G. Zhu, L. Liu, S. Li, X. Yang and S. Wang, High-performance  
248 lanthanum-based metal–organic framework with ligand tuning of the microstructures  
249 for removal of fluoride from water, *J. Colloid Interface Sci.*, 2022, **607**, 1762-1775.
- 250 23. D. H. Xie, , X. Ge, W. X. Qin and Y. X. Zhang, NH<sub>2</sub>-MIL-53 (Al) for simultaneous  
251 removal and detection of fluoride anions, *Chinese J. Chem. Phys.*, 2021, **34**(2), 227-  
252 237.

- 253 24. W .Li, T .Zhang, L. Lv, Y. Chen, W. Tang and S. Tang, Room-temperature synthesis  
254 of MIL-100 (Fe) and its adsorption performance for fluoride removal from water,  
255 *Colloids Surf. A Physicochem. Eng. Asp.*, 2021, **624** , 126791.
- 256 25. Yang, Y., Li, X., Gu, Y., Lin, H., Jie, B., Zhang, Q., & Zhang, X. (2022). Adsorption  
257 property of fluoride in water by metal organic framework: optimization of the process  
258 by response surface methodology technique. *Surfaces and Interfaces*, 28, 101649.
- 259
- 260
- 261
- 262
- 263
- 264
- 265
